# Supplementary material for: Chikungunya outbreak (2017) in Bangladesh: Clinical profile, economic impact and quality of life during the acute phase of the disease
Source: PubMed Central journal article supplement (PMC6025877; doi:10.1371/journal.pntd.0006561), 2018-06-06
Supplement: pntd.0006561.s002.pdf [file pntd.0006561.s002.pdf]

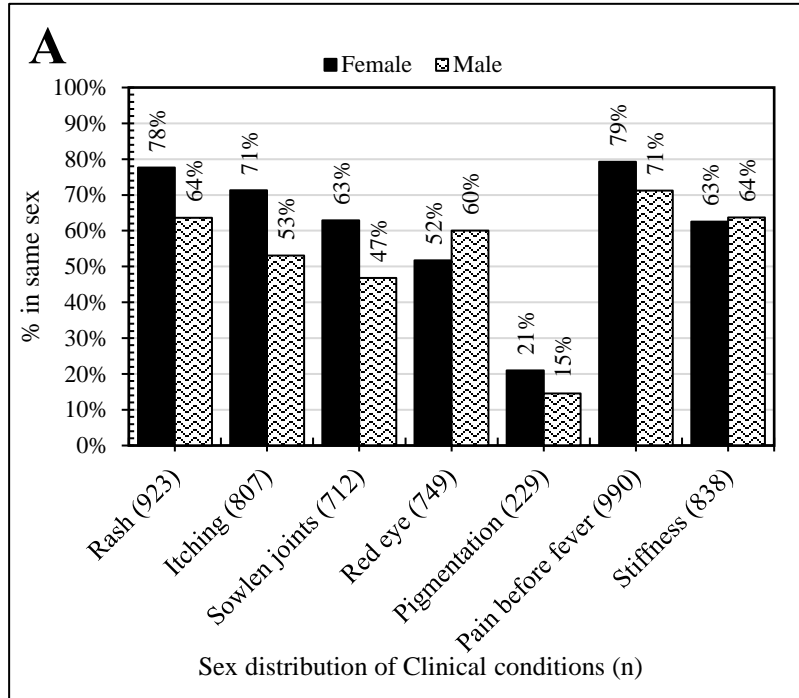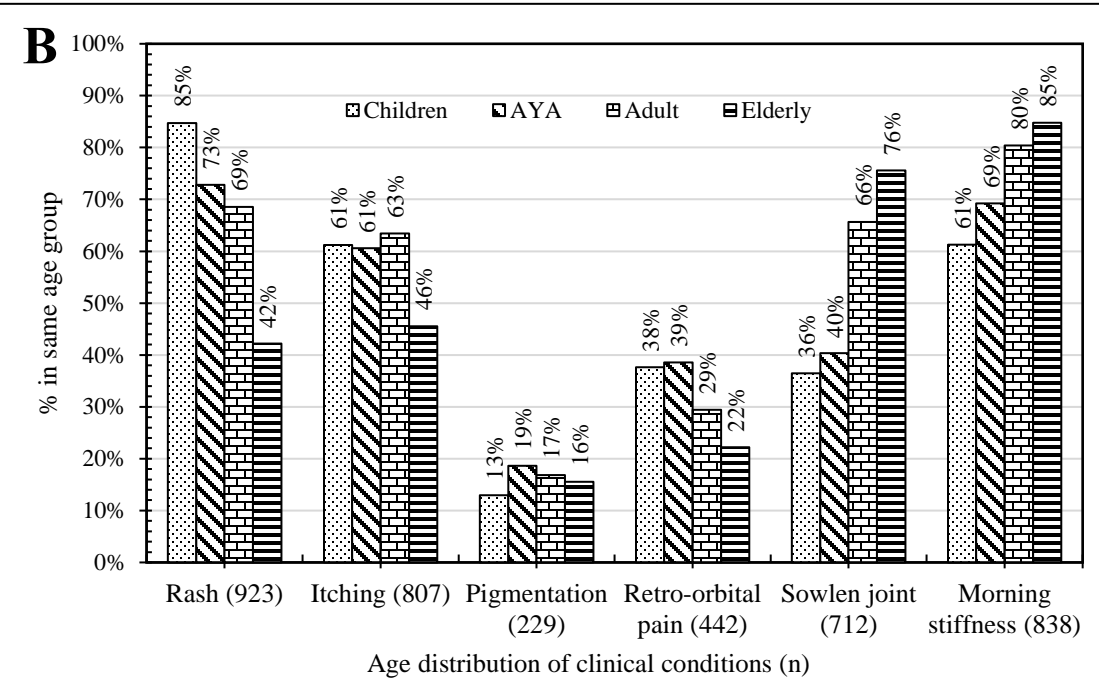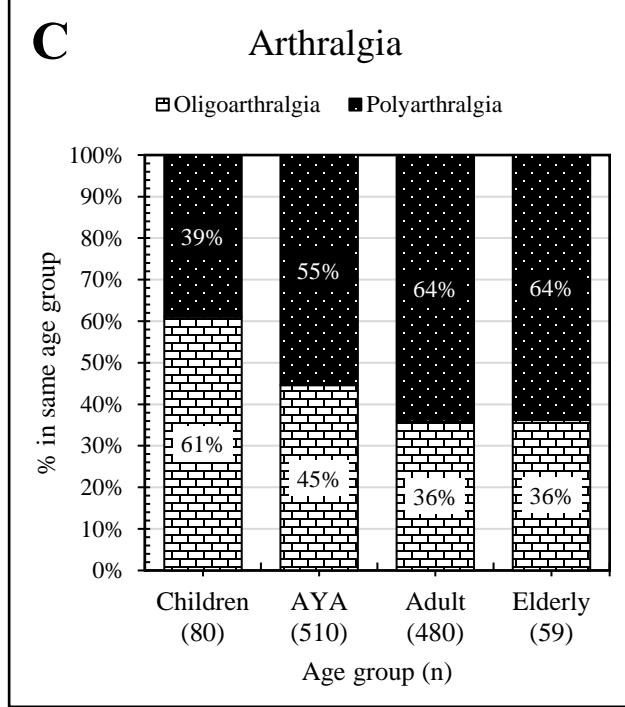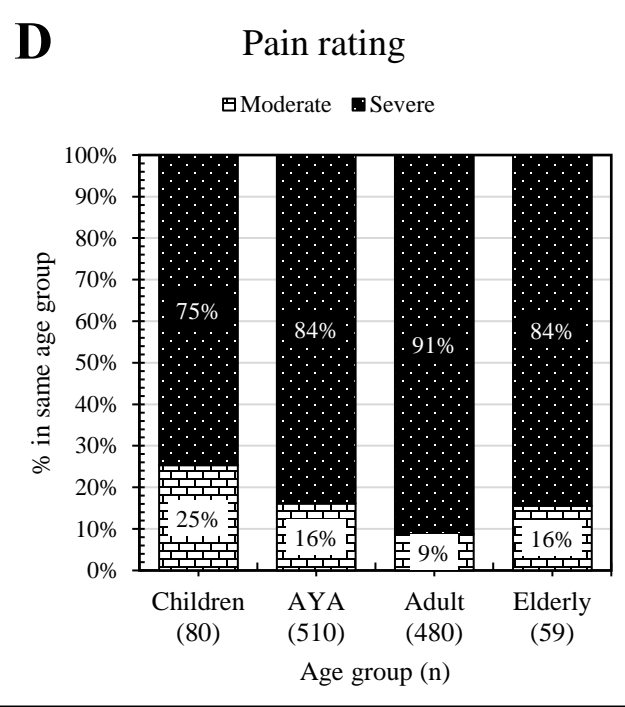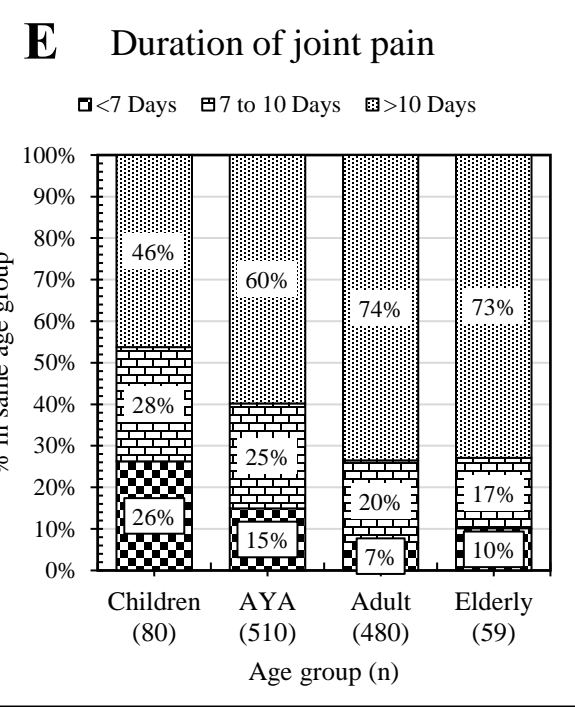

**S1 Fig.**
